# Supplementary material for: MicroRNA-451 as an Early Predictor of Chronic Kidney Disease in Diabetic Nephropathy
Source: Int J Nephrol. 2020 Aug 14;2020:8075376. doi: 10.1155/2020/8075376 (PMC7443237; doi:10.1155/2020/8075376)
Supplement: Supplementary Materials — The authors have attached a single supplementary file that includes some of their patients' data. The authors are responsible for providing the final supplementary materials files that will be published along with the article. [file 8075376.f1.xlsx]

## Sheet: microRNA-uremia
sex	age	BUN	creat	groupwgfr	eGFR	HBA1c	cholesterol	LDL	TG	HDL	CRP	HB	WBCS	PLAT	DUR	urinemicro	albumninplas	albuminurine	grp	microplasma
2	60	30	1	1	95.9	11.3	199	120	130	46	1	10.8	4.6	290	1	23	4	20	1	28
1	49	29	0.9	1	95.3	7.2	210	100	123	50	1.1	11	9	250	1.5	24	3.9	15	1	27
1	51	29	0.9	1	94.6	9.3	190	119	130	43	1.3	9.9	10	216	1	29	4	15	1	29
1	43	26	1	1	86.7	7.5	200	120	120	44	1.3	12	8	278	1	27	3.9	18	1	28
1	49	59	1	1	84.4	8.4	190	110	130	45	0.5	8.7	2.7	290	12	22	4	900	3	31
1	49	26	1	1	84.4	11.4	200	135	123	43	1	10.5	7.9	210	1	21	3.8	270	2	28
1	49	29	1	1	84.4	7.5	180	119	130	40	0.77	9.9	8.9	224	1	26	3.8	18	1	27
1	49	28	1	1	84.4	7.3	210	123	119	45	0.9	12	10.5	224	1	22	3.8	22	1	28
1	50	29	1	1	84.1	13	199	127	127	50	2	12	4.9	250	0.5	20	3	16	1	27
1	52	64	1	1	83.4	11.1	199	118	167	50	0.6	8.9	4.4	230	9	19	4	650	3	31
1	52	30	1	1	83.4	6.9	200	110	123	43	1	10.5	10	277	1	21	4	19	1	27
1	52	30	1	1	83.4	7.5	210	127	160	39	1.5	11	7	290	1	26	3.9	25	1	27
1	50	28	1	1	82.5	7.2	200	124	119	40	2	11	6.9	224	2	24	4	20	1	27
1	58	30	1	1	81.6	9.1	230	119	120	50	0.7	12	8	277	1	23	3.9	15	1	26
1	60	59	1	1	81	7.8	180	121	125	39	0.7	12.8	5.3	224	10	22	4	500	3	31
1	43	26	1.1	1	77.7	9.3	230	125	120	44	1.3	12	4.6	277	1	27	3.9	170	2	29
1	49	58	1.1	1	75.6	6.8	196	111	134	42	0.6	12	4.4	224	15	23	3.8	650	3	31
1	49	57	1.1	1	75.6	10.1	189	123	120	39	0.3	10.4	5.9	277	12	20	3.9	870	3	30
1	49	26	1	1	75.6	9.3	199	120	120	44	1.3	12	8	290	1	25	3.9	170	2	30
1	49	30	1.1	1	75.6	7.3	210	106	120	40	2	11	6.7	200	2	24	3.9	250	2	27
1	51	28	1.1	1	75	8.1	200	120	119	45	0.9	12	4.6	224	1	23	4	230	2	28
1	55	28	1.1	1	73.9	6.9	223	118	129	43	1	10.5	5	224	0.5	23	3.9	120	2	27
1	60	55	1	1	72.6	6.8	190	125	130	39	0.7	8.8	6.5	224	11	19	4	840	3	29
1	65	50	1.1	1	71.4	9.6	189	114	122	47	0.7	8.2	12.8	195	17	21	3.9	800	3	30
1	43	64	1.2	1	70.2	8.4	188	119	123	40	0.5	12.8	32	122	8	23	3.9	900	3	30
2	51	27	0.9	1	70.2	8.6	199	117	120	45	1	13	6	237	1	21	3.9	23	1	27
1	44	60	1.2	1	69.9	9.8	179	115	140	50	0.5	10.1	5.7	224	9	24	3.8	800	3	32
1	49	54	1.2	1	68.4	8.6	210	120	128	39	0.8	8.4	4.9	236	12	20	3.7	400	3	30
1	50	62	1.2	1	68.1	12.3	210	120	130	49	0.5	15.5	5.2	160	9.6	20	3.7	670	3	32
1	50	29	1.2	1	68.1	9.4	200	120	127	50	2	12	4.9	200	0.5	21	3.9	185	2	28
1	50	29	1.2	1	68.1	9.3	198	115	127	50	2	12	4.9	290	0.5	25	3	185	2	26
2	59	30	0.9	1	68.1	7.5	190	115	129	50	1.4	12	6.4	253	0.5	27	4	23	1	27
2	60	59	0.9	1	67.9	7.9	183	120	156	45	0.4	10.6	5.7	260	11	19	3.9	360	3	32
2	60	63	0.9	1	67.9	6.9	200	123	112	50	0.4	11.7	10.3	250	14	20	3.8	800	3	32
2	60	29	0.9	1	67.9	7.4	210	120	130	40	1.5	9.8	8.4	224	1.3	23	3.9	230	2	28
2	60	29	0.9	1	67.9	8.4	200	120	130	40	1.5	9.8	8.4	250	1.3	21	3.9	17	1	28
2	60	29	0.9	1	67.9	10.4	200	119	120	42	1.4	11	6.7	224	1	25	3.9	23	1	27
1	52	30	1.2	1	67.6	7.2	180	122	123	43	1	10.5	10	210	1	24	4	270	2	28
2	34	29	1	1	67.5	9.4	200	115	130	49	1	11	9	220	1	26	4	19	1	27
1	55	60	1.2	1	66.8	11.5	190	119	134	40	0.5	10.3	4.6	224	7.5	23	3.9	670	3	30
1	55	28	1.2	1	66.8	7.9	210	120	129	43	1	10.5	6.7	290	0.5	23	4	120	2	28
1	55	28	1.2	1	66.8	12.2	199	120	129	43	1	10.5	5	227	0.5	23	4	25	1	27
2	45	30	1	1	63.7	8.5	176	120	140	39	0.9	11	6.7	250	1.2	22	4	190	2	30
2	45	30	1	1	63.7	9.1	190	116	140	39	0.9	11	6.7	224	1.2	22	4	22	1	27
2	49	28	1	1	62.6	10.2	200	117	129	42	1	11	9.6	230	0.5	30	3.9	25	1	27
1	49	65	1.3	1	62.4	7.6	198	129	133	43	0.6	12.2	17.1	155	12	20	3.8	700	3	31
2	51	27	1	1	62.4	7.7	230	119	120	45	1	13	6	250	1	21	3.9	175	2	28
1	49	28	1.3	1	62.4	6.8	200	123	119	45	0.9	12	7.9	250	1	24	3.8	230	2	29
2	51	55	1	1	62.1	8.7	198	118	140	50	0.73	9.9	6.5	224	3	20	3.7	400	3	30
2	51	22	1	1	62.1	8.1	220	126	120	45	1	13	4.9	250	1	26	3.9	175	2	28
1	51	52	1.3	1	61.9	11.1	180	117	123	48	0.5	11.4	7.1	259	5	24	4	890	3	33
2	52	66	1	1	61.9	9.5	199	115	143	41	0.5	12.6	6.6	224	11	21	4	340	3	30
2	52	33	1	1	61.9	12.1	210	124	140	49	2	11	7.5	250	1	27	3.8	21	1	27
2	55	29	1	1	61.2	12.3	220	110	130	46	1	10.8	4.6	200	1	22	3.9	230	2	29
2	55	28	1	1	61.2	6.9	210	120	130	47	1.2	14	6.7	224	1	22	4.2	22	1	26
2	56	65	0.9	1	61	6.7	188	120	123	44	0.6	14.4	4.6	260	7	20	3.6	890	3	31
2	56	30	1	1	61	14.1	200	120	130	47	1.7	11	5.9	243	1	26	3.9	20	1	28
1	55	28	1.3	1	60.9	11.4	189	130	119	40	2	11	6.7	277	2	22	4	250	2	27
1	56	58	1.3	1	60.7	11.9	210	111	150	51	0.7	8.8	3.9	224	5.5	20	4	480	3	31
1	57	30	1.3	1	60.5	8.2	199	126	134	44	1.1	12	8.4	200	1	25	3.9	27	1	28
2	60	26	1	1	60.1	8.5	189	128	140	39	0.9	11	6.7	190	1.2	22	4	190	2	26
2	60	27	1	1	60.1	7.6	190	130	130	40	1.5	9.8	4.6	224	1.3	21	4	230	2	27
2	60	25	1	1	60.1	9.1	210	115	123	45	2	8.9	8.5	200	1	23	3.8	100	2	27
2	60	30	1	1	60.1	7.8	230	125	130	46	1	10.8	4.6	200	1	23	3.6	230	2	28
2	60	29	1	1	60.1	10.7	189	118	130	40	1.5	9.8	8.4	250	1.3	21	3.9	230	2	28
2	60	23	1	1	60.1	12.1	210	130	123	45	2	8.9	8.5	200	1	23	4	100	2	28
2	60	29	1	1	60.1	8.5	189	118	120	42	0.9	10.1	9.5	224	0.5	25	4.1	20	1	27
2	60	30	1	1	60.1	6.8	199	120	123	45	2	8.9	8.5	200	1	23	4	20	1	27
1	68	59	1.3	2	58.3	7.2	200	120	133	49	0.6	10.7	7.1	176	8	22	4.1	680	3	31
1	50	52	1.4	2	57	11.4	200	110	127	46	0.62	11.1	6.8	224	10	20	4	350	3	30
2	50	23	1.1	2	55.9	8.7	200	116	123	44	1.5	11	6.9	224	1.5	22	4	167	2	28
2	50	28	1.1	2	55.9	11.3	200	120	123	44	1.5	11	6.9	277	1.5	26	3.7	167	2	29
2	50	28	1.1	2	55.9	9.2	210	119	123	44	1.5	11	6.9	277	1.5	22	3.7	19	1	27
1	56	29	1.4	2	55.7	12.3	190	120	119	49	0.9	10.9	4.9	224	1.5	22	3.5	190	2	29
1	56	29	1.4	2	55.7	7.8	200	120	119	49	0.9	10.9	7.9	224	1.5	21	3.7	20	1	29
1	60	29	1.4	2	54.9	9.5	199	110	119	49	0.9	10.9	8	224	1.5	21	3.7	190	2	28
2	55	28	1.1	2	54.8	12.3	200	120	123	44	1.5	11	6.9	170	1.5	22	3.7	167	2	29
1	62	55	1.4	2	54.6	7.8	199	120	145	39	0.66	7.1	6.2	230	6.5	22	3.8	450	3	32
1	45	58	1.5	2	53.8	6.9	210	120	130	44	0.7	11.1	6.3	224	8	23	3.9	300	3	29
2	60	60	1.1	2	53.8	7.3	189	100	129	44	0.3	9.8	12.2	250	10	21	3.9	700	3	30
2	65	29	1.1	2	53	8.3	210	120	120	41	0.9	10	4.5	224	1	29	4	20	1	28
2	59	59	1.2	2	48.9	12.3	190	123	136	47	0.6	13.9	4.6	165	6	23	3.7	900	3	32
2	49	30	1.3	2	46.3	8.4	200	130	120	40	1.5	12	8	224	1	24	4.4	100	2	29
2	55	66	1.3	2	45.2	12.5	200	122	140	49	0.6	7.1	4.7	224	9	22	3.9	490	3	30
2	55	30	1.3	2	45.2	7.7	210	100	120	40	1.5	12	8	244	1	22	4.4	20	1	29
2	60	30	1.3	2	44.4	10.5	220	122	120	40	1.5	12	7.9	250	1	22	4.4	100	2	27
1	52	60	1.8	2	42.3	13.1	200	123	134	38	0.5	7.34	9.8	224	11	20	4	600	3	31
2	50	26	1.4	2	41.5	8.9	210	120	119	48	1	10.9	7.7	224	1.4	28	3.9	20	1	28
1	49	54	1.9	2	40.2	9.3	200	110	170	33	0.43	10.1	8.9	224	4.5	21	3.9	500	3	32
2	49	60	1.6	2	36.4	8.9	220	119	119	49	0.6	10	5.7	260	5	19	3.9	390	3	32
